# Supplementary material for: Biochemical properties and substrate specificity of GOB-38 in Elizabethkingia anophelis
Source: PubMed Central journal article supplement — Sci Rep. 2025 Jan 2;15:351. doi: 10.1038/s41598-024-82748-2 (PMC11695579; doi:10.1038/s41598-024-82748-2), 2025-01-02
Supplement: 41598_2024_82748_MOESM3_ESM.pdf [file 41598_2024_82748_MOESM3_ESM.pdf]

## Unveiling GOB-38: The New Face of Drug Resistance in *Elizabethkingia anophelis*

Ren Liu,<sup>1\*</sup> Yang Liu,<sup>2,3,4\*</sup> Jichui Qiu,<sup>1</sup> Qun Ren,<sup>1</sup> Chunping Wei,<sup>1</sup> Dejin Pan,<sup>1</sup> Jianglong Shi,<sup>1,2</sup> Peng Liu,<sup>3</sup> DanDan Wei,<sup>3,4</sup>

Tianxin Xiang,<sup>2,4,5#</sup> Na Cheng,<sup>1,2,5#</sup>

Supplementary Data 1 – 119 strains of *A. baumannii* were obtained from Genbank

| num. | name             | assemble     | date       |
|------|------------------|--------------|------------|
| 1    | SDF              | ASM6920v1    | 2008-2-29  |
| 2    | ACICU            | ASM1844v1    | 2008-4-15  |
| 3    | AYE              | ASM6924v1    | 2008-2-29  |
| 4    | AB0057           | ASM2124v2    | 2017-6-27  |
| 5    | ATCC17978        | ASM1542v1    | 2007-5-1   |
| 6    | ATCC19606        | ASM1933165v1 | 2021-7-23  |
| 7    | Ab5075-UW        | ASM96381v1   | 2015-3-27  |
| 8    | AB181-VUB        | ASM2254857v1 | 2022-3-3   |
| 9    | KSK10            | ASM1772415v1 | 2021-04-03 |
| 10   | 2021CK-01332     | ASM2525878v1 | 2022-09-19 |
| 11   | DB003            | ASM2474974v1 | 2022-08-26 |
| 12   | AbCTX1           | ASM1686429v1 | 2021-02-11 |
| 13   | 40288            | ASM1945771v1 | 2021-08-06 |
| 14   | 5767             | ASM2336119v1 | 2022-05-13 |
| 15   | DETAB-P90        | ASM2351769v1 | 2022-05-23 |
| 16   | LUH 6011         | ASM2473242v1 | 2022-08-22 |
| 17   | 2014BJAB1        | ASM1709820v2 | 2021-11-16 |
| 18   | AbCTX13          | ASM1686491v1 | 2021-02-11 |
| 19   | AB217-VUB        | ASM2246819v1 | 2022-03-03 |
| 20   | 1326569          | ASM2585401v1 | 2022-10-26 |
| 21   | AB79             | ASM2155969v1 | 2022-01-24 |
| 22   | OC064            | ASM2474948v1 | 2022-08-26 |
| 23   | ZHOU             | ASM2977419v1 | 2023-04-17 |
| 24   | A54R             | ASM2413468v1 | 2022-07-04 |
| 25   | C1107            | ASM2442666v1 | 2022-07-25 |
| 26   | BM2333           | ASM2172541v1 | 2022-01-30 |
| 27   | VB280821         | ASM2380970v1 | 2022-06-20 |
| 28   | NY5301           | ASM2275956v1 | 2022-03-30 |
| 29   | 2018HBAB1        | ASM1709822v2 | 2021-11-16 |
| 30   | JAB186           | ASM2971386v1 | 2023-04-13 |
| 31   | MAB9             | ASM2971416v1 | 2023-04-13 |
| 32   | 2014LNAB1        | ASM1709642v2 | 2021-11-16 |
| 33   | 19WIARLN022_full | ASM3058536v1 | 2023-08-02 |
| 34   | A54S             | ASM2413462v1 | 2022-07-04 |
| 35   | RCH52            | ASM2081065v1 | 2021-11-09 |
| 36   | YC103            | ASM2172946v1 | 2022-01-31 |
| 37   | B10              | ASM1935607v1 | 2021-07-27 |
| 38   | RAB97            | ASM2971384v1 | 2023-04-13 |
| 39   | NY13623          | ASM2572295v1 | 2022-10-17 |
| 40   | Mu1956           | ASM3016828v1 | 2023-06-05 |
| 41   | DETAB-C9         | ASM2922356v1 | 2023-03-16 |
| 42   | ABO21-A001       | ASM3319203v1 | 2023-11-01 |
| 43   | RAB53            | ASM2971390v1 | 2023-04-13 |
| 44   | DSM30011-VUB     | ASM2246681v1 | 2022-03-03 |
| 45   | 19WIARLN011_full | ASM3058538v1 | 2023-08-02 |
| 46   | HKU7             | ASM2052040v1 | 2021-10-18 |

|     |                |              |            |
|-----|----------------|--------------|------------|
| 47  | KBN10P05679    | ASM2417222v1 | 2022-07-06 |
| 48  | AB6870155      | ASM79412v2   | 2022-12-21 |
| 49  | UC24371        | ASM2413843v1 | 2022-07-05 |
| 50  | Mu1984         | ASM3016824v1 | 2023-06-05 |
| 51  | RBH2           | ASM2606251v1 | 2022-11-08 |
| 52  | A9844          | ASM2875329v1 | 2023-02-21 |
| 53  | FDAARGOS_1360  | ASM1690313v1 | 2021-02-17 |
| 54  | WU_164         | ASM2755885v1 | 2023-01-03 |
| 55  | 1326595        | ASM2585413v1 | 2022-10-26 |
| 56  | SNUBHABO291    | ASM3318100v1 | 2023-11-01 |
| 57  | AB3927         | ASM2473080v1 | 2022-08-22 |
| 58  | X4-65          | ASM2981497v1 | 2023-04-18 |
| 59  | 18WIARLN0023   | ASM3058528v1 | 2023-08-02 |
| 60  | UC24137        | ASM2413907v1 | 2022-07-05 |
| 61  | E-011922       | ASM1990315v1 | 2021-09-08 |
| 62  | 2018BJAB2      | ASM1709632v2 | 2021-11-16 |
| 63  | C1415          | ASM1860436v1 | 2021-06-01 |
| 64  | LMG994         | ASM2474960v1 | 2022-08-26 |
| 65  | ATCC BAA-17903 | ASM803325v2  | 2021-01-28 |
| 66  | MAB17          | ASM2971396v1 | 2023-04-13 |
| 67  | ABO21-A045     | ASM3319009v1 | 2023-11-01 |
| 68  | 37662RM1       | ASM2846402v1 | 2023-02-05 |
| 69  | 37662RM2       | ASM2846400v1 | 2023-02-05 |
| 70  | Ab-3557        | ASM2544915v1 | 2022-09-28 |
| 71  | 2018TJAB1      | ASM1709636v2 | 2021-11-16 |
| 72  | WM98           | ASM2820149v1 | 2023-01-29 |
| 73  | YZM-0406       | ASM2544919v1 | 2022-09-28 |
| 74  | AB329          | ASM2173041v1 | 2022-01-31 |
| 75  | UC20804        | ASM2413901v1 | 2022-07-05 |
| 76  | ABO21-A051     | ASM3319001v1 | 2023-11-01 |
| 77  | 2018HLJAB2     | ASM1709824v2 | 2021-11-16 |
| 78  | OCU-Ac19       | ASM2794368v1 | 2023-01-14 |
| 79  | 86II/2C        | ASM2858346v1 | 2023-02-10 |
| 80  | Ab-3556        | ASM2540297v1 | 2022-09-26 |
| 81  | ACI713         | ASM2090656v1 | 2021-11-21 |
| 82  | DB006          | ASM2474968v1 | 2022-08-26 |
| 83  | HNNY86G        | ASM3408307v1 | 2023-12-04 |
| 84  | OCU_Ac18       | ASM1970328v1 | 2021-07-07 |
| 85  | DETAB-E351     | ASM2351717v1 | 2022-05-23 |
| 86  | 2014TJAB1      | ASM1709634v2 | 2021-11-16 |
| 87  | EGA65          | ASM3002798v1 | 2023-05-17 |
| 88  | SNUBHABO277    | ASM3318180v1 | 2023-11-01 |
| 89  | YZM-0314       | ASM2544917v1 | 2022-09-28 |
| 90  | 17978UN        | ASM1935621v1 | 2021-07-27 |
| 91  | AbCTX9         | ASM1686431v2 | 2022-02-16 |
| 92  | LHC22-2        | ASM2027160v1 | 2021-10-05 |
| 93  | EGA10          | ASM3002800v1 | 2023-05-17 |
| 94  | SHOU-Ab01      | ASM2098528v1 | 2021-11-25 |
| 95  | FDAARGOS_1359  | ASM1690321v1 | 2021-02-17 |
| 96  | C9             | ASM2619463v2 | 2022-12-15 |
| 97  | F46            | ASM2322153v1 | 2022-05-03 |
| 98  | 2016GDAB1      | ASM2281190v1 | 2022-04-04 |
| 99  | Nord12-3       | ASM3442277v1 | 2023-12-16 |
| 100 | XH1935         | ASM2420526v1 | 2022-07-11 |

|     |                        |              |            |
|-----|------------------------|--------------|------------|
| 101 | NCCP 16007             | ASM2176472v1 | 2022-02-01 |
| 102 | EAB2                   | ASM2640920v1 | 2022-11-26 |
| 103 | 29D2                   | ASM2958201v1 | 2023-04-04 |
| 104 | 10_4                   | ASM1990317v1 | 2021-09-08 |
| 105 | M164-3                 | ASM2236927v1 | 2022-02-23 |
| 106 | SAAb472                | ASM3282261v1 | 2023-10-18 |
| 107 | WB4                    | ASM2990947v1 | 2023-05-01 |
| 108 | HNZZ130D               | ASM3408100v1 | 2023-12-04 |
| 109 | CAb-65                 | ASM1907668v1 | 2021-06-30 |
| 110 | Ax270                  | ASM1883146v1 | 2021-06-10 |
| 111 | 18 DeltaHON27_10825::k | ASM2945977v1 | 2023-03-29 |
| 112 | LRT                    | ASM2967480v1 | 2023-04-11 |
| 113 | Ab_8_4                 | ASM2967484v1 | 2023-04-11 |
| 114 | Canada BC-5            | ASM2837017v1 | 2023-02-01 |
| 115 | ARLG_6420              | ASM1488021v2 | 2021-08-26 |
| 116 | NCCP 15989             | ASM2412625v1 | 2022-07-03 |
| 117 | F-1629                 | ASM2413792v1 | 2022-07-05 |
| 118 | R4-1                   | ASM2138788v2 | 2022-06-13 |
| 119 | CCBH31258              | ASM2450562v1 | 2022-08-02 |

Supplementary Data 2 - 59 strains of *E. anophelis* were obtained from Genbank

| num. | name            | assemble                            | date       |
|------|-----------------|-------------------------------------|------------|
| 1    | R26             | ASM202366v2                         | 2017-09-18 |
| 2    | JUNP 353        | ASM981021v1                         | 2019-12-21 |
| 3    | F3201           | ASM202208v1                         | 2017-03-06 |
| 4    | 296-96          | ASM969726v1                         | 2019-11-23 |
| 5    | 344-1           | ASM2420564v1                        | 2022-07-11 |
| 6    | SUE             | ASM1470224v1                        | 2020-09-22 |
| 7    | 367-19          | ASM2420508v1                        | 2020-09-22 |
| 8    | 2-62            | ASM2420504v1                        | 2022-07-11 |
| 9    | JM-87           | ASM202204v1                         | 2017-03-06 |
| 10   | 362-2           | ASM2420510v1                        | 2022-07-11 |
| 11   | 347-10          | ASM2420552v1                        | 2022-07-11 |
| 12   | 346-72          | ASM2420554v1                        | 2022-07-11 |
| 13   | 356-17          | ASM2420512v1                        | 2022-07-11 |
| 14   | 348-50          | ASM2420548v1                        | 2022-07-11 |
| 15   | 343-63          | ASM2420558v1                        | 2022-07-11 |
| 16   | 346-66          | ASM2420556v1                        | 2022-07-11 |
| 17   | 351-72          | ASM2420542v1                        | 2022-07-11 |
| 18   | 349-83          | ASM2420544v1                        | 2022-07-11 |
| 19   | 354-72          | ASM2420518v1                        | 2022-07-11 |
| 20   | 347-96          | ASM2420546v1                        | 2022-07-11 |
| 21   | 355-58          | ASM2420514v1                        | 2022-07-11 |
| 22   | 2023CK-00282    | ASM2889848v3                        | 2023-08-09 |
| 23   | EAV_NVH72       | EAV_NVH72 complete genome sequence  | 2023-06-01 |
| 24   | 2002C02-176     | ASM2222150v1                        | 2022-02-14 |
| 25   | 347-50          | ASM2420550v1                        | 2022-07-11 |
| 26   | 354-87          | ASM2420516v1                        | 2022-07-11 |
| 27   | 2008N07-201     | ASM2222144v1                        | 2022-02-14 |
| 28   | EAV_NNN508      | EAV_NNN508 complete genome sequence | 2023-06-01 |
| 29   | EAV_NVH490      | EAV_NVH490 complete genome sequence | 2023-06-01 |
| 30   | EAV_VTKC53      | EAV_VTKC53 complete genome sequence | 2023-06-01 |
| 31   | E6809           | ASM202323v2                         | 2017-03-09 |
| 32   | 2022CK-00262    | ASM2309294v2                        | 2023-01-17 |
| 33   | AR4-6           | ASM231051v1                         | 2017-09-18 |
| 34   | AR6-8           | ASM231053v1                         | 2017-09-18 |
| 35   | FDAARGOS_198    | ASM227799v2                         | 2018-03-02 |
| 36   | 313-22          | ASM2420560v1                        | 2022-07-11 |
| 37   | C08             | ASM2544913v1                        | 2022-09-28 |
| 38   | 2-14            | ASM2420502v1                        | 2022-07-11 |
| 39   | 2-8             | ASM2420506v1                        | 2022-07-11 |
| 40   | 3375            | ASM202206v1                         | 2017-03-06 |
| 41   | FDAARGOS_132    | ASM295139v1                         | 2018-02-20 |
| 42   | FDAARGOS_134    | ASM295145v1                         | 2018-02-20 |
| 43   | 0422            | ASM202202v1                         | 2017-03-06 |
| 44   | 277-17          | ASM2420562v1                        | 2022-07-11 |
| 45   | F3543           | ASM202482v1                         | 2017-03-10 |
| 46   | SEA01           | ASM1683862v1                        | 2021-02-09 |
| 47   | CSID_3015183678 | ASM159617v2                         | 2016-04-20 |
| 48   | CSID_3015183684 | ASM161846v2                         | 2016-04-20 |
| 49   | CSID_3015183681 | ASM161854v2                         | 2016-04-20 |
| 50   | 2008S01-229     | ASM2222146v1                        | 2022-02-14 |
| 51   | 229-MNO-R       | ASM2222142v1                        | 2022-02-14 |

|    |                 |              |            |
|----|-----------------|--------------|------------|
| 52 | 090-MNO-R       | ASM2222140v1 | 2022-02-14 |
| 53 | 2002N07-090     | ASM2222148v1 | 2022-02-14 |
| 54 | AWYL_1          | ASM2987331v1 | 2023-04-26 |
| 55 | CSID_3000521207 | ASM161850v2  | 2016-04-20 |
| 56 | Ag1             | ASM24009v3   | 2017-09-18 |
| 57 | NUHP1           | ASM49593v2   | 2014-08-27 |
| 58 | FMS-007         | ASM101167v1  | 2015-05-21 |
| 59 | T02             | ASM2962365v1 | 2023-04-08 |
